## ***Plasmodium vivax* Malaria viewed through the lens of an eradicated European strain**

Lucy van Dorp<sup>1+\*</sup>, Pere Gelabert<sup>2+</sup>, Adrien Rieux<sup>3</sup>, Marc de Manuel<sup>2</sup>, Toni de-Dios<sup>2</sup>, Shyam Gopalakrishnan<sup>4</sup>, Christian Carøe<sup>4</sup>, Marcela Sandoval-Velasco<sup>4</sup>, Rosa Fregel<sup>5,6</sup>, Iñigo Olalde<sup>7</sup>, Raül Escosa<sup>8</sup>, Carles Aranda<sup>9</sup>, Silvie Huijben<sup>10,11</sup>, Ivo Mueller<sup>12,13,14</sup>, Tomàs Marquès-Bonet<sup>2,15,16,17</sup>, François Balloux<sup>1</sup>, M. Thomas P Gilbert<sup>4,18</sup> and Carles Lalueza-Fox<sup>2\*</sup>

<sup>1</sup>UCL Genetics Institute, University College London, Gower Street, London WC1E 6BT, UK

<sup>2</sup>Institute of Evolutionary Biology (CSIC-UPF), 08003 Barcelona, Spain

<sup>3</sup>CIRAD, UMR PVBMT, St. Pierre de la Réunion, France

<sup>4</sup>Section for EvoGenomics, Natural History Museum of Denmark, University of Copenhagen, 1350 Copenhagen, Denmark

<sup>5</sup>Department of Genetics, Stanford University, Stanford, California, United States

<sup>6</sup>Department of Biochemistry, Microbiology, Cell Biology and Genetics, Universidad de La Laguna, 38206 La Laguna, Spain

<sup>7</sup>Department of Genetics, Harvard Medical School, Boston, 02115 MA, United States

<sup>8</sup>Consorti de Polítiques Ambientals de les Terres de l'Ebre (COPATE), 43580 Deltebre, Spain

<sup>9</sup>Servei de Control de Mosquits, Consell Comarcal del Baix Llobregat, 08980 Sant Feliu de Llobregat, Spain

<sup>10</sup>Center for Evolution and Medicine, School of Life Sciences, Arizona State University, Tempe, 85281 AZ, USA

<sup>11</sup>Center for Evolution and Medicine, School of Life Sciences, Arizona State University, Tempe, AZ, USA

<sup>12</sup>ISGlobal, Barcelona Institute for Global Health, Hospital Clínic-Universitat de Barcelona, 08036 Barcelona, Spain

<sup>13</sup>Population Health and Immunity Division, Walter & Eliza Hall institute, Parkville, 3052 VIC, Australia

<sup>14</sup>Department of Medical Biology, University of Melbourne, Parkville, 3052 VIC, Australia

<sup>15</sup>Catalan Institution of Research and Advanced Studies (ICREA), 08010 Barcelona, Spain

<sup>16</sup>CNAG-CRG, Centre for Genomic Regulation (CRG), Barcelona Institute of Science and Technology, 08028 Barcelona, Spain

<sup>17</sup>Institut Català de Paleontologia Miquel Crusafont, Universitat Autònoma de Barcelona, 08193 Cerdanyola del Vallès, Barcelona, Spain

<sup>18</sup>Norwegian University of Science and Technology (NTNU) University Museum, N-7491 Trondheim, Norway

+Both authors equally contributed to this work; \*Corresponding authors: Lucy van Dorp ([lucy.dorp.12@ucl.ac.uk](mailto:lucy.dorp.12@ucl.ac.uk)) and Carles Lalueza-Fox ([carles.lalueza@upf.edu](mailto:carles.lalueza@upf.edu))

## 1 **Abstract**

2 The protozoan *Plasmodium vivax* is responsible for 42% of all cases of malaria outside Africa. The  
3 parasite is currently largely restricted to tropical and subtropical latitudes in Asia, Oceania and the  
4 Americas. Though, it was historically present in most of Europe before being finally eradicated during  
5 the second half of the 20th century. The lack of genomic information on the extinct European lineage  
6 has prevented a clear understanding of historical population structuring and past migrations of *P.*  
7 *vivax*. We used medical microscope slides prepared in 1944 from malaria-affected patients from the  
8 Ebro Delta in Spain, one of the last footholds of malaria in Europe, to generate a genome of a  
9 European *P. vivax* strain. Population genetics and phylogenetic analyses placed this strain basal to a  
10 cluster including samples from the Americas. This genome allowed us to calibrate a genomic  
11 mutation rate for *P. vivax*, and to estimate the mean age of the last common ancestor between  
12 European and American strains to the 15th century. This date points to an introduction of the parasite  
13 during the European colonisation of the Americas. In addition, we found that some known variants for  
14 resistance to anti-malarial drugs, including Chloroquine and Sulfadoxine, were already present in this  
15 European strain, predating their use. Our results shed light on the evolution of an important human  
16 pathogen and illustrate the value of antique medical collections as a resource for retrieving genomic  
17 information on pathogens from the past.

18

## 19 **Introduction**

20 Malaria is a leading cause of infectious disease, responsible for an estimated 200 million infections  
21 annually, and around 429,000 fatal cases (World Health Organisation 2017). The disease is caused by  
22 several species of parasitic protozoans from the genus *Plasmodium*, which are transmitted by various  
23 species of mosquitoes from the genus *Anopheles*. Two species in particular - *P. falciparum* and *P.*  
24 *vivax* - are responsible for the majority of human infections worldwide. Although *P. falciparum*  
25 causes 99% of malaria deaths globally, *P. vivax* is the aetiological agent of 42% of all cases outside of  
26 Africa (Gething et al. 2011; World Health Organisation 2017).

27

28 Today, the endemicity of genus *Plasmodium* is restricted to tropical and subtropical latitudes,  
29 spanning large regions of East and South-East Asia, Sub-Saharan Africa, Central and South America  
30 and Melanesia (Battle et al. 2012; Howes et al. 2016; Battle et al. 2019; Weiss et al. 2019). However,  
31 malaria was historically present in most of Europe, from the Mediterranean to the southern shores of  
32 the Baltic Sea, and from southern Britain to European Russia (Huldén et al. 2005). Malaria was  
33 eradicated from all European countries during the second half of the 20th century (Hay et al. 2004),  
34 with Spain being one of its last footholds from which it was only declared officially eradicated in  
35 1964 (Pletsch 1965). Nevertheless, even though *Plasmodium* is currently largely absent from Europe,  
36 its potential re-emergence has been identified as a plausible consequence of climate change (Petersen  
37 et al. 2013; Zhao et al. 2016).

38

39 Whilst historically being described as the “benign” form of malaria, *P. vivax* is increasingly  
40 recognized as a significant cause of disease and mortality (Tjitra et al. 2008; Price et al. 2009; Lacerda  
41 et al. 2012; Baird 2013). In stark contrast to *P. falciparum*, *P. vivax* is capable of producing recurrent  
42 malaria episodes from a single infection due to its resistant latent forms known as hypnozoites  
43 (Gonzalez-Ceron et al. 2013; Adekunle et al. 2015). This capacity also allows *P. vivax* to maintain  
44 itself in temperate climates, resting in a dormant state in the cold months when anopheline  
45 populations are in diapause, and creating a persistent presence of parasite reservoirs which can  
46 facilitate wide-spread transmission and recurrent long-term infections (Krotoski 1985; Gething et al.  
47 2011; White 2011). Low parasite densities of *P. vivax* in mixed infections (Mayxay et al. 2004;  
48 Moreira et al. 2015) and the suggested high proportion of hypozoonite-derived clinical incidence  
49 (Price et al. 2009; Howes et al. 2016) means the global prevalence of *P. vivax* is likely systematically  
50 underestimated in comparison to the more well studied *P. falciparum*.

51

52 *P. vivax* is widely considered to have emerged in Sub-Saharan Africa, a region in which it is now at  
53 low prevalence (Liu et al. 2014; Gunalan et al. 2018; Twohig et al. 2019). From there, it is thought to  
54 have spread globally through a complex pattern of migration events by hitchhiking with its human  
55 host, as humans moved out of Africa (Culleton et al. 2011; Hupalo et al. 2016). The analysis of a  
56 geographically diverse dataset of 941 *P. vivax* mitochondrial DNA (mtDNA) genomes detected  
57 genetic links between strains from the Americas to those from Africa and South Asia, although  
58 potential contributions from Melanesia into the Americas were also identified (Rodrigues et al. 2018).  
59 However, the role of the worldwide colonial expansion of European countries in the global dispersal  
60 of *P. vivax* remains largely unknown, mainly due to the lack of available sequenced nuclear genomes  
61 from now-extinct European strains.

62

63 The recent discovery of a set of historic microscope slides with bloodstains from malaria-affected  
64 patients provides major opportunities to shed light on the evolution of *P. vivax*. The slides were  
65 prepared between 1942-1944 in the Ebro Delta (Spain), an area where the disease was transmitted by  
66 the mosquito species *Anopheles atroparvus*, a member of the *A. maculipennis* complex - still very  
67 common in the region - and provided the first retrieval of genetic material from historical European *P.*  
68 *vivax* (Gelabert et al. 2016) as well as a partial *P. falciparum* genome (de-Dios et al. 2019 *in press*).  
69 The complete mtDNA genome of this sample showed a close genetic affinity to the most common  
70 strains of present-day South and Central America, suggesting their introduction into the Americas was  
71 linked to Spanish colonial-driven transmission of European strains. However, mtDNA is a maternally  
72 inherited single locus and, in comparison to the entire genome, has limited power to reconstruct  
73 complex evolutionary histories.

74

75 In this paper, we extend these previous findings, by reporting the complete genome of an extinct  
76 European *P. vivax* obtained from the historical Ebro Delta microscope slides. Together with the recent  
77 publication of a more accurately annotated *P. vivax* reference genome (PvP01) (Auburn et al. 2016),  
78 this European genome provides new opportunities to resolve the historical dispersals of this parasite  
79 using genome-wide data. The availability of this complete genome also allows direct estimation of an  
80 evolutionary rate for *P. vivax*, making it possible to date the clustering of the historic European strain  
81 with modern global strains. Furthermore, it enables us to ascertain the presence of some resistance-  
82 alleles prior to the introduction of most anti-malaria drugs. This information is critical for further  
83 investigations into the evolution of the parasite, as well as predicting future emergences of drug-  
84 resistance mutations.

85

## 86 **Results**

87 We generated shotgun Illumina sequence data from four archival blood slides derived from malaria  
88 patients sampled between 1942 and 1944 in Spain's Ebro Delta. The majority of reads that mapped to  
89 *P. vivax* (89.09%) derived from a single slide dated to 1944. In total, 481,245 DNA reads (0.44% of  
90 the total reads generated) mapped to *P. vivax*, yielding a composite genome, we term Ebro-1944, at  
91 1.4x coverage (1.28x deriving from the newly analysed 2017 slide), and spanning 66.42% of the  
92 (PvP01) reference. The mtDNA genome was recovered at 32x coverage (Supplementary fig. 1-3 and  
93 Supplementary Tables 1-2). Although working with low coverage ancient genomes is challenging, the  
94 fact that our genome is haploid and displays low levels of post-mortem sequencing errors suggests it  
95 can be reliably used in most evolutionary analyses.

96

97 To explore the phylogeographic affinities of the eradicated European strain we performed several  
98 population genomics analyses (Supplementary fig. 4-5 and Supplementary Table 3). A principal  
99 component analysis (PCA) applied to a global dataset of *P. vivax* showed strong geographic structure,  
100 with clusters separating 1) South East Asian/East Asian strains; 2) Oceanian strains (those from  
101 Malaysia were placed between the two clusters); 3) Indian and Madagascan strains and 4) those  
102 sampled from Central/South America (fig. 1a,b). The European sample (labelled Ebro-1944) falls at  
103 one end of the latter cluster, on an axis of variation shared by strains from Mexico, Brazil, Colombia  
104 and Peru.

105

106 Model-based clustering implemented in an unsupervised ADMIXTURE analysis (fig. 1c,  
107 Supplementary fig. 6) provided qualitatively consistent inferences to those observed by PCA, with  
108 one ancestry component maximised in Oceanian samples, two largely shared by East and South East  
109 Asian samples and three further components which largely differentiate samples from South and  
110 Central America. The ancestry of Ebro-1944 is mostly modelled by the three components identified in  
111 samples from South America (~56% Peru-like and ~22% Colombia-like) and Central America (12%

112 Mexico-like), although a minor proportion of ancestry is shared with both South East Asian (~5%)  
113 and Oceanian (~5%) samples.

114

115 To formally test these suggested relationships, we calculated  $f_4$  statistics (Patterson et al. 2012) of the  
116 form ( $P. cynomolgi$ , Ebro-1944; X, Y), where X and Y are tested for all combinations of samples  
117 isolated from 15 worldwide locations (fig. 2).  $P. cynomolgi$  was selected as an outgroup as it  
118 represents the closest non-human infecting *Plasmodium* species (Tachibana et al. 2012). This statistic  
119 is designed to quantify the covariance in allele frequency differences between  $P. cynomolgi$  and Ebro-  
120 1944 relative to  $P. vivax$  from sampled worldwide locations (X and Y), with a more positive  $f_4$  value  
121 indicating a closer relationship of Ebro-1944 to samples from Y relative to X. Using this framework  
122 and testing all possible topological relationships, Ebro-1944 was found to share significantly more  
123 derived alleles with Central and Southern American strains compared to those sampled from South  
124 East and East Asia (fig. 2, Supplementary fig. 7). These results collectively support the presence of a  
125 cline of ancestry stretching from Europe to the Americas, with our eradicated European strain  
126 showing strong phylogenetic affinity to modern  $P. vivax$  samples from Mexico, Brazil and Peru.

127

128 Additional evidence was also obtained using an unrelated method designed to cluster global samples  
129 based on inferred patterns of haplotype sharing (Lawson et al. 2012). Considering haplotype variation  
130 rather than allele frequency differences increases power to resolve fine-scale genetic structure (Leslie  
131 et al. 2015) and is robust to potential SNP calling errors (Conrad et al. 2006). Haplotype-based  
132 clustering grouped Ebro-1944 with samples from South and Central America (fig. 3a). This result was  
133 robust to the inclusion of different samples in the dataset, to moderate imputation, and remained  
134 consistent when either uncorrelated sites or linked sites were considered (Supplementary fig. 8-10,  
135 Supplementary Section 4 and Methods).

136

137 Given the strong phylogeographic affinity of Ebro-1944 to  $P. vivax$  currently in circulation in the  
138 Americas, we tested whether the divergence of Ebro-1944 from American strains is better explained  
139 by a deep-split, for example at the time of the original human settlement of the Americas at least  
140 15,000 years ago, or is more consistent with a recent introduction to the Americas. Genomes obtained  
141 from historical or ancient materials provide unique opportunities to calibrate phylogenetic trees, by  
142 directly associating sampling dates with the sequences representing the phylogeny tips (terminal  
143 nodes). These in turn enable inference of divergence times and mutation rates without the need for  
144 any other age-related external data (Rieux and Balloux 2016). Therefore, to infer the temporal  
145 relationship of Ebro-1944 to strains from the Americas, we included our historic sample together with  
146 15 closely-related publicly available genomes sampled over a range of time periods (Supplementary  
147 Table 4). We selected strains predominantly from the Americas, with three additional genomes  
148 included from India, Myanmar and North Korea to root the topology and increase the time span of our

149 dataset.

150

151 To account for the possible confounding effect of genetic recombination, we filtered the resulting  
152 alignment for a set of high confidence congruent SNPs. Specifically, we removed all homoplasies i.e.  
153 SNPs in the alignment in conflict with the maximum parsimony phylogeny (see Methods). This  
154 approach identifies, with no required prior knowledge, regions of the genome that are hyper-variable,  
155 deriving from recombination or mixed infections, as well as filtering SNPs which may have been  
156 erroneously called due to low sequence quality or post-mortem damage. The resulting alignment  
157 exhibited a significant positive correlation between the root-to-tip phylogenetic distances of a  
158 maximum likelihood phylogeny and the time of sampling, indicating the presence of detectable  
159 temporal accumulation of *de novo* mutations within the timescale of our dataset (fig. 3b).

160

161 Mutation rates were subsequently estimated using the Bayesian phylogenetic tool BEAST2  
162 (Bouckaert et al. 2014) testing a range of demographic and clock rate priors. We estimated the  
163 mutation rate over the tested alignment to  $5.57E^{-7}$  substitution/site/year [HPD 95%  $2.75E^{-8} - 1.06E^{-6}$ ].  
164 Though a broad estimate, we obtained low values ( $<0.15$ ) of the standard deviation of the uncorrelated  
165 log-normal relaxed clock (ucl.d.stdev), suggesting little variation in rates between branches. This  
166 approximation enabled us to infer that the historical Ebro-1944 genome shares a common ancestor  
167 with strains in the South-American cluster dating to the 13<sup>th</sup> to 19<sup>th</sup> centuries (mean 1415; HPD 95%  
168 1201-1877CE) (fig. 3c, Supplementary fig. S11, Supplementary Table 5).

169

170 A number of mutations conferring resistance to antimalarial drug treatments developed in the later  
171 decades of the 20th century have been identified in *P. vivax*. For instance, mutations in the *pvdhfr*  
172 gene are known to be involved in resistance to pyrimethamine (de Pecoulas et al. 1998; Imwong et al.  
173 2001; Imwong et al. 2003; Huang et al. 2014) whilst mutations at the *pvdhps* gene confer resistance to  
174 sulfadoxine (Korsinczky et al. 2004; Menegon et al. 2006; Hawkins et al. 2009). Other genes,  
175 including *pvm-dr1* (Brega et al. 2005; Sá et al. 2005; Barnadas, Tichit, et al. 2008), *CRT* (Suwanarusk  
176 et al. 2007) or *pvmrp1* (Dharia et al. 2010) are thought to be involved in chloroquine resistance. *P.*  
177 *vivax* populations also exhibit high genetic diversity in genes related to immune evasion and host  
178 infectivity, including *MSP10*, *MSP7* and *CLAG*. We annotated 4,800 SNPs in the Ebro-1944 genome  
179 (Supplementary Table 6). Of these, 1195 are missense mutations, which represent 60.6% of the genic  
180 mutations. Similar ratios have been reported in other *P. vivax* strains (Hupalo et al. 2016; Pearson et al.  
181 2016; de Oliveira et al. 2017).

182

183 Ebro-1944 carries the derived allele in three SNPs located in genes functionally associated to  
184 antimalarial drug resistance. Two of these, Val1478Ile and Thr259Arg (Dharia et al. 2010; de Oliveira  
185 et al. 2017) are in the *pvm-dr1* gene and another, Met205Ile (Hawkins et al. 2009), occurs in the



186 *pvdhps* gene (Supplementary Tables 7-8). We also identified a previously undescribed mutation  
187 (Leu623Arg) in *CLAG*, a gene associated with host infectivity (Gupta et al. 2015). Additionally, we  
188 screened multiple loci (N=516) that have previously been reported to exhibit strong signals of recent  
189 natural selection in a geographically diverse set of modern *P. vivax* samples (Hupaloo et al. 2016).  
190 Some of these regions encompass genes previously known to be involved in anti-malarial drug  
191 resistance, including three with strong experimental validation of resistance phenotypes: *pvmdr1*, *dhfr*  
192 and *dhfps* (Haldar et al. 2018). Our historical genome has 355 of these positions covered by at least  
193 two reads, of which Ebro-1944 exhibits the ancestral allele in 349 (Supplementary Table 9). Therefore,  
194 only six of the 355 derived variants with high  $F_{ST}$  values (including the previously mentioned  
195 Met205Ile variant at *pvdhps* gene) were present in the historical European sample, suggesting a rapid  
196 accumulation of resistance conferring mutations in more recent strains.

197

## 198 Discussion

199 Our genome-wide analyses of a historic European *P. vivax* nuclear genome confirm the inference,  
200 previously based solely on mtDNA, that extinct European *P. vivax* are closest genetically to strains  
201 currently in circulation in Central and South America (Gelabert et al. 2016). Historical accounts of the  
202 presence of tertian (*P. vivax*) malaria in Europe date to at least Classical Greece (De Zulueta 1973;  
203 Carter 2003), suggesting that the most parsimonious explanation is an introduction of *P. vivax* from  
204 Europe into the Americas and not the other way around. A migration event from Europe into the  
205 Americas is further supported by the European Ebro-1944 *P. vivax* strain falling as an outgroup to all  
206 the strains from the Americas (fig. 3c). Finally, the estimated mean age of divergence in the 15<sup>th</sup>  
207 century between Ebro-1944 and strains in circulation in the Americas (fig. 3c) is consistent with an  
208 introduction of *P. vivax* malaria into the Americas by European colonists.

209

210 Whether any agent of malaria was present in the Americas prior to European contact (1492) has been  
211 debated (Carter 2003; Hume 2003; de Castro and Singer 2005). It is relatively unlikely that any  
212 malarial parasites would have survived the journey across the Bering strait during the initial peopling  
213 of the Americas some 15,000 years ago (Waters et al. 2018) due to the absence of mosquito vectors at  
214 these high latitudes allowing the parasites to fulfill their life cycles (Tanabe et al. 2010). However,  
215 accounts of the therapeutic use by Incas of cinchona tree bark, from which quinine derives, have been  
216 interpreted as suggestive of malaria being present in the Americas pre-Columbian contact (Escardo  
217 1992). Though, its use may have been motivated by the effectiveness of quinine in the treatment of  
218 other fever-causing illnesses.

219

220 Older split times between *P. vivax* lineages from the Americas and the rest of the world than the one  
221 we inferred based on whole genome sequences have been suggested from the analysis of mtDNA  
222 genomes (Taylor et al. 2013; Rodrigues et al. 2018). Though, we note that, even when accounting for

223 the posterior uncertainty around our inferred mutation rate, all possible temporal estimates place the  
224 split time between the European and American strains as incompatible with an introduction of *P.*  
225 *vivax* into the Americas alongside the first humans to colonize the continent. Our results are therefore  
226 highly supportive of an introduction of *P. vivax* to the Americas during the European colonial period,  
227 with our range also consistent with the transatlantic slave trade between Africa and Spanish and  
228 Portuguese-run ports in Central and South America. Our analyses of the nuclear genome further point  
229 to a minor genetic component in American strains shared with strains from Madagascar, India and Sri  
230 Lanka (fig. 1c, fig.3a). We interpret this as likely evidence for secondary genetic introgression into the  
231 American *P. vivax* population by lineages from different regions of the world, which would be  
232 consistent with the high *P. vivax* mtDNA diversity previously described in the Americas (Taylor et al.  
233 2013; Hupalo et al. 2016; de Oliveira et al. 2017; Rodrigues et al. 2018).

234  
235 In this work, we restricted the phylogenetic dating to the migration of *P. vivax* into the Americas.  
236 There is currently no consensus over the age of the most recent common ancestor of all extant,  
237 worldwide *P. vivax* strains. Some previous estimates inferred the origin of *P. vivax* to around 5,000 or  
238 10,000 years ago (Carter 2003; Leclerc et al. 2004; Lim et al. 2005), whereas far older dates have been  
239 proposed, including 45,000-81,000 years (Escalante et al. 2005) or even 53,000-265,000 years (Mu et  
240 al. 2005). An extrapolation of our inferred evolutionary rates to the global diversity of extant *P. vivax*  
241 strains would point to a recent origin for the parasite. Though, formally estimating the age of *P. vivax*  
242 through a phylogenetic ‘tip dating’ approach poses a series of analytical challenges. For example, the  
243 homoplasy screening method we employed to exclude homoplasies caused by mixed infections and  
244 likely genetic recombination is currently not computationally tractable for a dataset comprising a large  
245 number of globally sourced whole *P. vivax* genomes. Possible solutions to this problem may arise  
246 through optimisation of sequencing protocols to generate higher quality Plasmodium whole genome  
247 sequences together with the development of downstream bioinformatics approaches designed to  
248 propagate genotype calling uncertainty and deconvolve mixed infections (Zhu et al. 2018). This  
249 should be aided by the generation of further high-quality reference genomes across the Plasmodium  
250 genus, for example using long-read sequencing technology (Auburn et al. 2016; Pasini et al. 2017;  
251 Gilabert et al. 2018; Otto et al. 2018).

252  
253 Reconstruction of the phylogeographic relationships between *P. vivax* strains is complicated further  
254 by mounting evidence for the zoonotic potential of *P. vivax* and *P. vivax-like* strains; with host-jumps  
255 likely having occurred several times in the parasite’s evolutionary history (Prugnolle et al. 2013; Liu  
256 et al. 2014; Liu et al. 2017; Loy et al. 2017). The discovery of the platyrrhine protozoa, *Plasmodium*  
257 *simium*, as morphologically (Ott 1967) and genetically (Leclerc et al. 2004; Escalante et al. 2005; Lim  
258 et al. 2005) indistinguishable from *P. vivax* suggests very recent host transfers between South  
259 American monkeys and humans; in some cases responsible for the incidence of zoonotic malarial



260 disease (Brasil et al. 2017; Buery et al. 2017). This raises important questions as to what should be  
261 considered as the host-range of *Plasmodium vivax* and queries what species delineation should be  
262 applied in comparative genomics studies. Recurrent host jumps of *P. vivax* lineages into humans from  
263 animal reservoirs, with subsequent demographic expansions and possible lineage replacements, may  
264 point to a recent age for the ancestor of all extant *P. vivax* strains, despite now extinct lineages of the  
265 parasite having likely plagued humans for far longer.

266  
267 Malaria is widely believed to have exerted one of the strongest selective forces on the human genome  
268 (Hedrick 2012). Well known examples of selection against malaria include protective mutations at the  
269 *HBB* gene that give rise to resistant isoforms of proteins such as HbS and HbE in African and Asian  
270 populations, respectively, and mutations at the *G6PD* gene which are broadly spread in African  
271 populations and are also present in the Mediterranean (Tishkoff et al. 2001; Kwiatkowski 2005;  
272 Howes et al. 2012). One of the best-known examples of directional selection is the FY\*0 Duffy blood  
273 negative genotype that confers resistance to *P. vivax* which is close to fixation in sub-Saharan Africa  
274 but essentially absent in other regions of the world. The protein is the key invasion receptor for the  
275 human malarial parasites *P. vivax*, *P. knowlesi* and the simian malarial parasite *P. cynomolgi*  
276 (Kosaisavee et al. 2017). Exposure to an ancestor of *P. vivax* may have led to the sweep of the FY\*0  
277 allele in sub-Saharan Africa some 40,000 years ago and may represent the fastest known selective  
278 sweep for any human gene (McManus et al. 2017).

279  
280 Though, given the relatively mild clinical symptoms of modern *P. vivax*, it is not inconceivable that  
281 the selective forces that led to the fixation of the FY\*0 allele in sub-Saharan Africa may have been  
282 caused by another malaria parasite. A further complicating factor stems from increasing evidence  
283 accumulating for previously unrecognised endemic *P. vivax* circulating in human populations from  
284 Sub-Saharan Africa, including in Duffy-negative hosts (Gunalan et al. 2018; Twohig et al. 2019). The  
285 presence of endemic *P. vivax* malaria in sub-Saharan Africa may suggest that the FY\*0 allele may  
286 confer only partial protection against *P. vivax* malaria. Our results, which point to a recent, post-  
287 European contact exposure of Native American populations to *P. vivax* malaria, would not have had  
288 the time to drive the emergence and spread of resistance alleles comparable to those observed in  
289 Africa and Europe. Consistently, to date, no known malaria resistance variants have been identified in  
290 Native Americans (Hume 2003; Kwiatkowski 2005).

291  
292 Irrespective of its role in the past, the rapid spread of *P. vivax* strains resistant to antimalarial drugs is  
293 an area of increasing concern. Initially, Chloroquine was established as the main therapy against *P.*  
294 *vivax* infections in 1946 (Most and London 1946; Baird 2004). It was a well-tolerated and effective  
295 treatment until resistance appeared in the late 1980s and spread through the entirety of the endemic  
296 range of *P. vivax* (Rieckmann et al. 1989). However, despite extensive drug resistance within present-

297 day *P. vivax* populations, caused by a variety of resistance loci in multiple genes (Hupalo et al. 2016),  
298 chloroquine-primaquine combined therapy remains the most commonly prescribed treatment (Phillips  
299 et al. 1996), as few other therapeutic strategies are available. The increase in frequency of drug  
300 resistant strains is thus a significant public health threat with major human and economic costs.

301  
302 Our historical sample predates the use of all anti-malaria drugs, with the exception of quinine which  
303 was introduced in Europe as early as 1683 (Achan et al. 2011). Ebro-1944 carries the ancestral allele  
304 in an overwhelming number of SNPs (99.3%) known to have undergone selection in modern strains,  
305 including those associated with drug resistance in genes such as *DHFR-TS* (de Pecoulas et al. 1998;  
306 Leartsakulpanich et al. 2002; Imwong et al. 2003; Ganguly et al. 2014; Huang et al. 2014) and *MDR1*  
307 (Brega et al. 2005; Sá et al. 2005; Barnadas, Ratsimbaoa, et al. 2008; Orjuela-Sánchez et al. 2009)  
308 (Supplementary Table 8). Conversely, Ebro-1944 carries three variants in the *pvmr1* and *pvdhps*  
309 genes that are plausible drug-resistance candidates against sulfadoxine and chloroquine. The presence  
310 of these alleles in Ebro-1944 might reflect standing variation in historical *P. vivax* populations for  
311 alleles providing resistance to modern antimalarial drugs. Alternatively, these could have been  
312 selected for by the historical use of quinine.

313  
314 Our study stresses the value of old microscopy slides and, more generally, of antique medical  
315 collections, as a unique and under-used resource for retrieving genomic information on pathogens  
316 from the past, including eradicated strains that could not be studied from contemporary specimens.  
317 For example, in addition to the results reported here, we also retrieved a partial *P. falciparum*  
318 genome from the same set of slides, which allowed us to demonstrate a stronger  
319 phylogeographic affinity of the extinct European *P. falciparum* lineage to present-day strains in  
320 circulation in central south Asia, rather than Africa (de-Dios et al. 2019 *in press*). We note that the  
321 slides we analysed here were stained but not fixed and it remains to be explored what additional DNA  
322 damage is exerted by different fixation methods. Additionally, our slides date from the years 1942-  
323 1944; however, it is likely that older slides are available in both public and private collections given  
324 the popularity of microscopy in Victorian times. A future objective will be to ascertain if massive  
325 genomic data retrieval can be achieved from even older microscopy slides.

326  
327 There is also potential to retrieve ancient *Plasmodium* sequences directly from archaeological  
328 specimens. The recent retrieval of *P. falciparum* sequences from ancient Roman human skeletal  
329 remains (Marciniak et al. 2016) demonstrates this approach is technically feasible, and as *P. vivax*  
330 infection is more prevalent than *P. falciparum*, it is plausible that further ancient strains from  
331 osteological material could be reported in the near future. An additional possibility would be to  
332 directly retrieve *Plasmodium* sequences from *Anopheles* remains preserved in ancient lake sediments

333 or in museum collections. The generation of additional historical sequences - both from Europe and  
334 from the Americas - together with an increased sequencing effort of extant *P. vivax* strains from  
335 under-sampled areas is our best hope to reconstruct the evolutionary history of this major parasite in  
336 more detail.

337

## 338 **Materials and Methods**

339

### 340 **Samples**

341 The slides analysed here belong to the personal collection of the descendants of Dr. Ildefonso Canicio,  
342 who worked in the antimalarial centre established by the Catalan Government at Sant Jaume d'Enveja  
343 (Ebro Delta, Spain) in 1925. Four slides were analysed, three of them included in a previous study  
344 (Gelabert et al. 2016). The new sample was a drop of blood from a double slide, stained with Giemsa  
345 (fig. 1b).

346

### 347 **DNA extraction**

348 DNA extraction was performed by incubating the slide with 20  $\mu$ L of extraction buffer (10 mM Tris-  
349 HCl (pH 8), 10 mM NaCl, 5 mM CaCl<sub>2</sub>, 2.5 mM EDTA, 1% SDS, 1% Proteinase K, 0.1% DTT  
350 (w/v)) in an oven at 37°C for 20 minutes for a total of three rounds. The resulting dissolved  
351 bloodstain and buffer were collected in a 1.5 mL Lobind Eppendorf and then incubated for one hour  
352 at 56°C. This was subsequently added to 10x volume of modified binding buffer (Allentoft et al.  
353 2015) and passed through a Monarch silica spin column (NEB) by centrifugation (Supplementary  
354 Methods Section 1 and Supplementary fig. 12). The column was washed once with 80% ethanol and  
355 DNA was subsequently released with EBT buffer to a final volume of 40  $\mu$ L (see Supplementary  
356 Material Section 1). All the analyses were performed in dedicated ancient DNA laboratories where no  
357 previous genetic work on *Plasmodium* had been carried out, both in Barcelona (extraction of slides in  
358 2016) and Copenhagen (extraction of slides in 2017).

359

### 360 **Library preparation and DNA sequencing**

361 Shotgun sequencing libraries for the Illumina platform were prepared using a single-tube protocol for  
362 double-stranded DNA (Christian et al. 2017), with minor modifications and improvements as detailed  
363 in Mak *et al.* (2017) (Supplementary Methods Section 2). Sequencing was performed at the Natural  
364 History Museum of Denmark on one lane of an Illumina HiSeq 2500 instrument in paired end mode  
365 running 125 cycles.

366

### 367 **Sequence mapping**

368 The sequenced reads were analysed with FastQC to determine the quality prior to and after adapter

369 clipping. The 3' read adapters and consecutive bases with low quality scores were removed using  
370 cutadapt 1.18 (Martin 2011). Reads shorter than 30 bp and bases with a quality score lower than 30  
371 were also excluded. To increase the final coverage, all *Plasmodium* reads were pooled and an in-  
372 house script was used to discriminate reads mapping more confidently to the *P. vivax* (PvP01)  
373 (Auburn et al. 2016) compared to the *P. falciparum* 3D7 (Gardner et al. 2002) reference genomes  
374 based on edit distance. Mapping of *P. vivax* reads was then performed with Burrows-Wheeler Aligner  
375 (BWA) (Li and Durbin 2009) 0.7.1 aln (Supplementary Methods Section 2). Duplicated reads were  
376 deleted using Picard tools 2.18.6 MarkDuplicates. MapDamage 2.0 (Ginolhac et al. 2011) was applied  
377 to check for signatures of post-mortem damage at the ends of the reads to validate the reads were  
378 associated with a historic sample rather than deriving from modern contamination. C to T and G to A  
379 substitutions at the 5' ends and 3' ends, respectively, were found to be present at a frequency of about  
380 2.5% (Supplementary fig. 1); consistent with the age of the sample and in agreement with the degree  
381 of damage previously detected in the mtDNA reads (Gelabert et al. 2016). As a result, the first two  
382 nucleotides of each read were also trimmed.

383

384 The newly generated paired-end *P. vivax* reads were merged with the sequencing reads generated in  
385 2016 (Gelabert et al. 2016). We refer to the resulting pooled sample as Ebro-1944. Genotypes were  
386 called from the alignment with GATK v3.7 UnifiedGenotyper (McKenna et al. 2010), using a  
387 minimum base quality of 30 and the standard confidence call threshold of 50. Genotype calls were  
388 filtered further with VCFtools (Danecek et al. 2011), excluding: i) heterozygous calls, ii) calls with  
389 depth of coverage <2, iii) calls present in the telomeres and subtelomeres (Pearson et al. 2016), iv)  
390 indels (Supplementary fig. 2 and 3). SNPs were annotated using SnpEff (Cingolani et al. 2012) for the  
391 analysis of variants associated with drug resistance.

392

### 393 **Population genetics dataset**

394 The dataset used in population genetics analyses comprised the nuclear sequences of 337 previous  
395 published samples of *P. vivax* (Hupalo et al. 2016; Pearson et al. 2016; Cowell et al. 2017; Cowell et  
396 al. 2018; Rodrigues et al. 2018), representing the global diversity of currently available *P. vivax*  
397 genomes (Supplementary Tables 3 and 10).

398

399 Sequence reads were aligned against the Sall reference genome (Carlton et al. 2008) with BWA 0.7.1  
400 aln (Li and Durbin 2009) using default parameters. Duplicated reads were removed using Picard tools  
401 2.18.6. Reads with mapping qualities below 30 were removed using SAMtools 1.6 (Li et al. 2009).  
402 For analyses requiring incorporation of an outgroup, we additionally mapped reads from the *P.*  
403 *cynomolgi* M strain (Pasini et al. 2017) against the Sall reference genome following the same  
404 protocol.

405

406 We used GATK v3.7 UnifiedGenotyper (McKenna et al. 2010) for SNP calling with a number of  
407 adjustments for working with *Plasmodium* genomes and ancient DNA. First, we selected 297 samples  
408 that had more than the 70% of the Sall reference genome covered and presented more than 3000  
409 substitutions. Using this filtered dataset of high-quality samples, we called variants using a mapping  
410 quality >30, depth of coverage >20 and a standard call confidence >50. We removed those SNPs that  
411 mapped to repetitive regions of the *P. vivax* reference genome (Pearson et al. 2016), heterozygous  
412 calls suggesting possible mixed infections, and SNPs that were present in less than three samples. The  
413 resultant dataset included 131,309 SNPs and 277 strains. We used this catalogue to genotype all  
414 remaining samples in the dataset. For the individual genotyping, we called SNPs with GATK v3.7  
415 UnifiedGenotyper as before, removing all heterozygous calls, and all variants with a minor allele  
416 frequency (MAF) below 0.01%. The final dataset comprised 338 samples and 128,081 SNPs. The  
417 genotypes for Ebro-1944 were called by selecting one random read that mapped each position of the  
418 dataset (Mathieson et al. 2015). This resulted in the Ebro-1944 sequence covering 77,425 of the  
419 128,081 total included positions.

420

#### 421 **Allele-frequency based measures of population structure**

422 The population genetics dataset was filtered for SNPs in high linkage disequilibrium (LD) using a 60  
423 SNP sliding window, advancing each time by 10 steps, and removing any SNPs with a correlation  
424 coefficient  $\geq 0.1$  with any other SNP within the window (Chang et al. 2015). This left a pruned dataset  
425 of 38,358 SNPs for analyses relying on independent SNPs. We applied PCA to the LD pruned global  
426 dataset restricted to only sites covered in all samples (Chang et al. 2015). We additionally clustered  
427 our dataset using the unsupervised clustering algorithm ADMIXTURE 1.3.0 (Alexander and  
428 Novembre 2009) for values of K between 1-15. K=6 provided the lowest cross-validation error  
429 (Supplementary fig. 6, fig. 1c). To evaluate the relationship of Ebro-1944 to other global strains we  
430 calculated  $f_4$  statistics using qpDstat available within AdmixTools (Patterson et al. 2012). Setting  
431 Ebro-1944 as a target, we explored which strains, grouped by geographic label, share more alleles  
432 with Ebro-1944 relative to every pairwise combination of modern strain(s) (X and Y) in our reference  
433 dataset and relative to *P. cynomolgi* as an outgroup:  $f_4(P. cynomolgi, \text{Ebro-1944}; X, Y)$ .

434

#### 435 **Inferring patterns of allele and haplotype sharing**

436 In addition, we applied an unrelated method to explore patterns of allele and haplotype sharing  
437 implemented in CHROMOPAINTER v2 (Lawson et al. 2012). Unlike  $f$ -statistics, this approach does  
438 not rely on a user specified topology and can thus consider the relationship of all strains to all others  
439 collectively. As this approach requires low levels of missingness across comparisons, we filtered the  
440 previously described unpruned population genetics dataset for only the positions present in Ebro-1944  
441 and retained only those samples with  $\leq 10\%$  missing data (77,420 sites, 218 samples). A schematic of  
442 the workflow is provided in Supplementary fig. 5.



443

444 Briefly, CHROMOPAINTER calculates, separately for each position, the probability that a  
445 “recipient” chromosome is most closely related to a particular “donor” in the dataset under a copying  
446 model framework (Li and Stephens 2003). Here, we use all strains as donors and the equivalent  
447 strains as recipients in an “all-versus-all” painting approach. To cluster strains, fineSTRUCTURE  
448 (Lawson et al. 2012) was applied to the all-versus-all coancestry matrix to group strains based on their  
449 inferred painting profiles. Given the variable missingness across the modern strains included in the  
450 alignment we implemented several analyses using the CHROMOPAINTER unlinked (allele-sharing)  
451 implementation, as well as under the linked CHROMOPAINTER (haplotype-sharing) model. To use  
452 the latter we performed various levels of imputation followed the protocol set out by Samad et al  
453 (2015) (Samad et al. 2015) for *P. falciparum* in BEAGLE v3.3.2 (Browning and Browning 2013).  
454 The consistency of our inference under different imputation and filtering criteria was assessed by  
455 linear regression (Supplementary fig. 10). Further details are provided in Supplementary Section 4.

456

#### 457 **Drug resistance variants analysis**

458 We used the annotations provided by SnpEff to identify non synonymous mutations in genes  
459 previously described as being related to antimalarial drug resistance and host infectivity (Cingolani et  
460 al. 2012; Gupta et al. 2015; Hupalo et al. 2016; Pearson et al. 2016; Rodrigues et al. 2018). We also  
461 screened a set of previous described positions that have shown recent signals of selection in *P. vivax*  
462 populations (Supplementary Table 7). In addition, we screened all potential genetic variants found in  
463 Ebro-1944, comprising more than 4000 SNPs (Supplementary Table 9).

464

#### 465 **Phylogenetic analysis and dataset**

466 The whole-genome sequences of 15 modern *P. vivax* samples and Ebro-1944 were mapped against the  
467 PvP01 reference assembly (Auburn et al. 2016) (Supplementary Table 4). These strains were  
468 selected with a focus on the Americas but also to include strains sampled over a large temporal span  
469 as is required for phylogenetic tip-dating. The main motivation for using the PvP01 reference genome  
470 for mapping sequence data for phylogenetic analyses stems from this assembly offering a better  
471 definition of sub-telomeric genes and repetitive *pir* genes that usually lie in recombinant regions, thus  
472 providing greater power to identify and exclude these parts of the genome (Auburn et al. 2016). After  
473 calling variants with GATK version 3.7 UnifiedGenotyper, polymorphisms were further filtered by  
474 selecting only those SNPs with a coverage >1 an average mapping quality >30, a genotype quality  
475 >30 and by removing heterozygous positions. The exonic positions were then classified as  
476 synonymous and non-synonymous with SnpEff (Cingolani et al. 2012).

477

478 Our final phylogenetic timeline dataset spanned 69 years (1944-2013) of evolution (Supplementary  
479 Table 4) across a 34,452 SNP alignment. In order to filter this alignment for only congruent SNPs for



480 phylogenetic dating we first generated a maximum parsimony phylogeny in MEGA7 (Kumar et al.  
481 2016), evaluating support for each branch over 100 boot-strap iterations. We then screened for  
482 homoplasies, sites in the 34,452 SNP alignment that do not support the maximum parsimony  
483 phylogeny, using HomoplasyFinder (Crispell et al. 2019). This led to the identification of 13,112  
484 homoplastic SNPs, many of which fell in sub-telomeric regions. All homoplastic sites were  
485 subsequently removed from the alignment. In this way we screen and exclude variants from the  
486 original alignment that fall in hyper-variable regions, that may arise from inaccurate SNP calling or  
487 post-mortem damage, as well as removing regions that derive from between-lineage genetic  
488 recombination or mixed infections.

489

### 490 **Estimating a timed phylogeny**

491 To investigate the extent of temporal signal existing in our homoplasy cleaned timeline alignment, we  
492 built a maximum-likelihood phylogenetic tree, without constraining tip-heights to their sampling  
493 times, using RaxML (Stamatakis 2014). After rooting the tree on the *P. cynomolgi* genome, we  
494 computed a linear regression between root-to-tip distance and sampling time using the roototip  
495 function from BactDating (Didelot et al. 2018). To further confirm the presence of a significant  
496 temporal signal, we assessed the significance of this regression following 1000 steps of date  
497 randomisation (fig. 3b). After confirmation of temporal signal in the dataset, substitution rates were  
498 estimated by running a tip-calibrated inference using Markov chain Monte Carlo (MCMC) sampling  
499 in BEAST 2 (Bouckaert et al. 2014). The best-fit nucleotide substitution model was estimated as  
500 TN93 following evaluation of all possible substitution models in BModelTest (Bouckaert and  
501 Drummond 2017). To minimise prior assumptions about demographic history we tested three possible  
502 demographic models: the coalescent constant, coalescent exponential and coalescent Bayesian skyline.  
503 In each case we set a log normal prior on a relaxed evolutionary clock as well as testing under a strict  
504 clock model.

505

506 To calibrate the tree using tip-dates only, we applied flat priors (i.e., uniform distributions) for the  
507 substitution rate ( $1.10E12 - 1.10E2$  substitutions/site/year), as well as for the age of any internal node  
508 in the tree. We ran five independent chains in which samples were drawn every 50,000 MCMC steps  
509 from a total of 500,000,000 steps, after a discarded burn-in of 10,000,000 steps. Convergence to the  
510 stationary distribution and sufficient sampling and mixing were checked by inspection of posterior  
511 samples (effective sample size  $>200$ ) in Tracer v1.6. The best-fit model was selected based on  
512 evaluation of both the median likelihood value of the model and the maximum likelihood estimator  
513 following path sampling (Baele et al. 2012) (Supplementary Table S5).

514

515 **Acknowledgements and funding information**

516 We are grateful to Thomas D. Otto (University of Glasgow) and Thomas Lavsten (University of  
517 Copenhagen) for helpful comments and suggestions and to the descendants of Dr Canicio, Miquel and  
518 Ildelfons Oliveras for sharing with us their slides. We additionally would like to thank Dr. George  
519 Busby and Dr. Jacob Almagro for useful discussions on chromosome painting of *Plasmodium sp.* This  
520 research was supported by a grant from Obra Social "La Caixa", Secretaria d'Universitats i Recerca  
521 Programme del Departament d'Economia i Coneixement de la Generalitat de Catalunya (GRC 2017  
522 SGR 880) and by FEDER-MINECO (PGC2018-095931-B-100) to C.L.-F and an ERC Consolidator  
523 Grant (681396-Extinction Genomics) to MTPG. LvD and FB acknowledge financial support from the  
524 Newton Trust UK-China NSFC initiative (grants MR/P007597/1 and 8166113800). *P. vivax* genomes  
525 are deposited at the European Nucleotide Archive under accession numbers XXXX-XXXX. We also  
526 thank the Danish National High Throughput Sequencing Centre for help in sequencing.

527

528 **Author contributions**

529 P.G., M.T.P.G., L.v.D., F.B. and C.L.-F. conceived and designed the study; R.E. and C.A. discovered  
530 the slides; C.C. developed and performed laboratory analysis; L.v.D., P.G., A.R., T. d.-D., S.G., R.F.,  
531 I.O., M.d.M. analysed data and performed computational analyses; S.H., F.B., T.M.-B. and I.M.  
532 provided comments and suggested analyses; L.v.D., F.B., and C.L.-F. wrote the paper with inputs  
533 from all co-authors.

534

535 **References**

- 536 Achan J, Talisuna AO, Erhart A, et al. 2011. Quinine, an old anti-malarial drug in a modern world:  
537 role in the treatment of malaria. *Malar J.* 10:144.  
538
- 539 Adekunle AI, Pinkevych M, McGready R, et al. 2015. Modeling the dynamics of *Plasmodium vivax*  
540 infection and hypnozoite Reactivation In Vivo. *PLoS Negl Trop Dis.* 9(3):1–18.  
541
- 542 Alexander DH, Novembre J. 2009. Fast Model-Based Estimation of Ancestry in Unrelated  
543 Individuals. *Genome Res.* 19(9):1655–1664.  
544
- 545 Allentoft ME, Sikora M, Sjögren K-G, et al. 2015. Population genomics of Bronze Age Eurasia.  
546 *Nature.* 522(7555):167–172.  
547
- 548 Auburn S, Böhme U, Steinbiss S, et al. 2016. A new *Plasmodium vivax* reference sequence with  
549 improved assembly of the subtelomeres reveals an abundance of *pir* genes. *Wellcome Open Res.*  
550 1(0):4.  
551
- 552 Baele G, Lemey P, Bedford T, et al. 2012. Improving the accuracy of demographic and molecular  
553 clock model comparison while accommodating phylogenetic uncertainty. *Mol Biol Evol.*  
554 29(9):2157–2167.  
555
- 556 Baird JK. 2004. Chloroquine resistance in *Plasmodium vivax*. *Antimicrob Agents Chemother.*  
557 48(11):4075–83.  
558
- 559 Baird JK. 2013. Evidence and implications of mortality associated with acute *Plasmodium vivax*  
560 Malaria. *Clin Microbiol Rev.* 26(1):36–57.  
561
- 562 Barnadas C, Ratsimbaoa A, Tichit M, et al. 2008. *Plasmodium vivax* resistance to chloroquine in  
563 Madagascar: Clinical efficacy and polymorphisms in *pvmdr1* and *pvcrt-o* genes. *Antimicrob*  
564 *Agents Chemother.* 52(12):4233–4240.  
565
- 566 Barnadas C, Tichit M, Bouchier C, et al. 2008. *Plasmodium vivax dhfr* and *dhps* mutations in  
567 isolates from Madagascar and therapeutic response to sulphadoxine-pyrimethamine. *Malar J.*  
568 7(1):35.  
569
- 570 Battle KE, Gething PW, Elyazar IRF, et al. 2012. The global public health significance of

- 571 *Plasmodium vivax*. *Advances in parasitology*. Vol. 80. p. 1–111.
- 572
- 573 Battle KE, Lucas TCD, Nguyen M, et al. 2019. Mapping the global endemicity and clinical burden  
574 of *Plasmodium vivax*, 2000–17: a spatial and temporal modelling study. *Lancet*.  
575 394(10195):332–343.
- 576
- 577 Bouckaert R, Heled J, Kühnert D, et al. 2014. BEAST 2: A Software Platform for Bayesian  
578 Evolutionary Analysis. *PLoS Comput Biol*. 10(4):e1003537.
- 579
- 580 Bouckaert RR, Drummond AJ. 2017. bModelTest: Bayesian phylogenetic site model averaging  
581 and model comparison. *BMC Evol Biol*. 17(1):42.
- 582
- 583 Brasil P, Zalis MG, de Pina-Costa A, et al. 2017. Outbreak of human malaria caused by  
584 *Plasmodium simium* in the Atlantic Forest in Rio de Janeiro: a molecular epidemiological  
585 investigation. *Lancet Glob Heal*. 5(10):e1038–e1046.
- 586
- 587 Brega S, Meslin B, de Monbrison F, et al. 2005. Identification of the *Plasmodium vivax* mdr-like  
588 gene (*pvm-dr1*) and analysis of single-nucleotide polymorphisms among isolates from different  
589 areas of endemicity. *J Infect Dis*. 191(2):272–277.
- 590
- 591 Browning BL, Browning SR. 2013. Improving the accuracy and efficiency of identity-by-descent  
592 detection in population data. *Genetics*. 194(2):459–471.
- 593
- 594 Buery JC, Rodrigues PT, Natal L, et al. 2017. Mitochondrial genome of *Plasmodium vivax/simum*  
595 detected in an endemic region for malaria in the Atlantic Forest of Espírito Santo state, Brazil:  
596 do mosquitoes, simians and humans harbour the same parasite? *Malar J*. 16(1):437.
- 597
- 598 Carlton JM, Adams JH, Silva JC, et al. 2008. Comparative genomics of the neglected human  
599 malaria parasite *Plasmodium vivax*. *Nature*. 455(7214):757–763.
- 600
- 601 Carter R. 2003. Speculations on the origins of *Plasmodium vivax* malaria. *Trends Parasitol*.  
602 19(5):214–219.
- 603
- 604 de Castro MC, Singer BH. 2005. Was malaria present in the Amazon before the European  
605 conquest? Available evidence and future research agenda. *J Archaeol Sci*. 32(3):337–340.
- 606

- 607 Chang CC, Chow CC, Tellier LC, et al. 2015. Second-generation PLINK: rising to the challenge of  
608 larger and richer datasets. *Gigascience*. 4(1):7.  
609
- 610 Carøe C, Gopalakrishnan S, Vinner L, et al. 2017. Single-tube library preparation for degraded  
611 DNA. *Methods Ecol Evol*. 9(2):410–419.  
612
- 613 Cingolani P, Platts A, Wang LL, et al. 2012. A program for annotating and predicting the effects of  
614 single nucleotide polymorphisms, SnpEff: SNPs in the genome of *Drosophila melanogaster* strain  
615 w1118; iso-2; iso-3. *Fly*. 6(2):80–92.  
616
- 617 Conrad DF, Jakobsson M, Coop G, et al. 2006. A worldwide survey of haplotype variation and  
618 linkage disequilibrium in the human genome. *Nat Genet*. 38(11):1251–1260.  
619
- 620 Cowell AN, Loy DE, Sundararaman SA, et al. 2017. Selective whole-genome amplification is a  
621 robust method that enables scalable whole-genome sequencing of *Plasmodium vivax* from  
622 unprocessed clinical samples. *MBio*. 8(1).  
623
- 624 Cowell AN, Valdivia HO, Bishop DK, et al. 2018. Exploration of *Plasmodium vivax* transmission  
625 dynamics and recurrent infections in the Peruvian Amazon using whole genome sequencing.  
626 *Genome Med*. 10(1):52.  
627
- 628 Crispell J, Balaz D, Gordon SV. 2019. HomoplasmyFinder: a simple tool to identify homoplasies on  
629 a phylogeny. *Microb Genomics*. 5(1).  
630
- 631 Culleton R, Coban C, Zeyrek FY, et al. 2011. The Origins of African *Plasmodium vivax*; Insights  
632 from mitochondrial genome Sequencing. *PLoS One*. 6(12):e29137.  
633
- 634 Danecek P, Auton A, Abecasis G, et al. 2011. The variant call format and VCFtools. *Bioinformatics*.  
635 27(15):2156–2158.  
636
- 637 De-Dios T, van Dorp L, Gelabert P, et al. 2019 Genetic affinities of an eradicated *Plasmodium*  
638 *falciparum* European strain. *Microbial Genomics*. *In press*.  
639
- 640 Dharia N V, Bright AT, Westenberger SJ, et al. 2010. Whole-genome sequencing and microarray  
641 analysis of ex vivo *Plasmodium vivax* reveal selective pressure on putative drug resistance genes.  
642 *Proc Natl Acad Sci*. 107(46):20045–20050.

643

644 Didelot X, Croucher NJ, Bentley SD, et al. 2018. Bayesian inference of ancestral dates on bacterial  
645 phylogenetic trees. *Nucleic Acids Res.* 46(22):e134–e134.

646

647 Escalante AA, Cornejo OE, Freeland DE, et al. 2005. A monkey's tale: The origin of *Plasmodium*  
648 *vivax* as a human malaria parasite. *Proc Natl Acad Sci.* 102(6):1980–1985.

649

650 Escardo F. 1992. Historia de la Cirurgia en el Peru. Editorial Monterrico S.A.

651

652 Ganguly S, Saha P, Chatterjee M, et al. 2014. Prevalence of polymorphisms in antifolate drug  
653 resistance molecular marker genes pvdhfr and pvdhps in clinical isolates of *Plasmodium vivax*  
654 from Kolkata, India. *Antimicrob Agents Chemother.* 58(1):196–200.

655

656 Gardner MJ, Hall N, Fung E, et al. 2002. Genome sequence of the human malaria parasite  
657 *Plasmodium falciparum*. *Nature.* 419(6906):498–511.

658

659 Gelabert P, Sandoval-Velasco M, Olalde I, et al. 2016. Mitochondrial DNA from the eradicated  
660 European *Plasmodium vivax* and *P. falciparum* from 70-year-old slides from the Ebro Delta in  
661 Spain. *Proc Natl Acad Sci.* 113(41):11495–11500.

662

663 Gething PW, Patil AP, Smith DL, et al. 2011. A new world malaria map: *Plasmodium falciparum*  
664 endemicity in 2010. *Malar J.* 10(1):378.

665

666 Gilabert A, Otto TD, Rutledge GG, et al. 2018. *Plasmodium vivax*-like genome sequences shed new  
667 insights into *Plasmodium vivax* biology and evolution. *PLOS Biol.* 16(8):e2006035.

668

669 Ginolhac A, Rasmussen M, Gilbert MTP, et al. 2011. mapDamage: Testing for damage patterns in  
670 ancient DNA sequences. *Bioinformatics.* 27(15):2153–2155.

671

672 Gonzalez-Ceron L, Mu J, Santillán F, et al. 2013. Molecular and epidemiological characterization  
673 of *Plasmodium vivax* recurrent infections in southern Mexico. *Parasit Vectors.* 6:109.

674

675 Gunalan K, Niangaly A, Thera MA, et al. 2018. *Plasmodium vivax* infections of duffy-negative  
676 erythrocytes: Historically undetected or a recent adaptation? *Trends Parasitol.* 34(5):420–429.

677

678 Gupta A, Thiruvengadam G, Desai SA. 2015. The conserved clag multigene family of malaria



- 679 parasites: Essential roles in host–pathogen interaction. *Drug Resist Updat.* 18:47–54.
- 680
- 681 Haldar K, Bhattacharjee S, Safeukui I. 2018. Drug resistance in *Plasmodium*. *Nat Rev Microbiol.*
- 682 16(3):156–170.
- 683
- 684 Hawkins VN, Suzuki SM, Rungsihirunrat K, et al. 2009. Assessment of the origins and spread of
- 685 putative resistance-conferring mutations in *Plasmodium vivax* dihydropteroate synthase. *Am J*
- 686 *Trop Med Hyg.* 81(2):348–355.
- 687
- 688 Hay SI, Guerra CA, Tatem AJ, et al. 2004. The global distribution and population at risk of
- 689 malaria: past, present, and future. *Lancet Infect Dis.* 4(6):327–336.
- 690
- 691 Hedrick PW. 2012. Resistance to malaria in humans: the impact of strong, recent selection.
- 692 *Malar J.* 11(1):349.
- 693
- 694 Howes RE, Battle KE, Mendis KN, et al. 2016. Global Epidemiology of *Plasmodium vivax*. *Am J*
- 695 *Trop Med Hyg.* 95(6 Suppl):15–34.
- 696
- 697 Howes RE, Piel FB, Patil AP, et al. 2012. G6PD deficiency prevalence and estimates of affected
- 698 populations in Malaria endemic countries: A geostatistical model-based map. *PLoS Med.*
- 699 9(11):e1001339.
- 700
- 701 Huang B, Huang S, Su X, et al. 2014. Molecular surveillance of *pvdhfr*, *pvdhps*, and *pvm-dr-1*
- 702 mutations in *Plasmodium vivax* isolates from Yunnan and Anhui provinces of China. *Malar J.*
- 703 13:346.
- 704
- 705 Huldén L, Huldén L, Heliövaara K. 2005. Endemic malaria: An “indoor” disease in northern
- 706 Europe. Historical data analysed. *Malar J.* 4:1–13.
- 707
- 708 Hume J. 2003. Malaria in antiquity: a genetics perspective. *World Archaeol.* 35(2):180–192.
- 709
- 710 Hupalo DN, Luo Z, Melnikov A, et al. 2016. Population genomics studies identify signatures of
- 711 global dispersal and drug resistance in *Plasmodium vivax*. *Nat Genet.* 48(8):953–958.
- 712
- 713 Imwong M, Pukrittakayamee S, Looareesuwan S, et al. 2001. Association of genetic mutations in
- 714 *Plasmodium vivax dhfr* with resistance to sulfadoxine-pyrimethamine: geographical and clinical

715 correlates. *Antimicrob Agents Chemother.* 45(11):3122–3127.  
716  
717 Imwong M, Pukrittayakamee S, Rénia L, et al. 2003. Novel point mutations in the dihydrofolate  
718 reductase gene of *Plasmodium vivax*: evidence for sequential selection by drug pressure.  
719 *Antimicrob Agents Chemother.* 47(5):1514–21.  
720  
721 Korsinczky M, Fischer K, Chen N, et al. 2004. Sulfadoxine resistance in *Plasmodium vivax* is  
722 associated with a specific amino acid in dihydropteroate synthase at the putative sulfadoxine-  
723 binding site. *Antimicrob Agents Chemother.* 48(6):2214–2222.  
724  
725 Kosaisavee V, Suwanarusk R, Chua ACY, et al. 2017. Strict tropism for CD71+/CD234+ human  
726 reticulocytes limits the zoonotic potential of *Plasmodium cynomolgi*. *Blood.* 130(11):1357–1363.  
727  
728 Krotoski WA. 1985. Discovery of the hypnozoite and a new theory of malarial relapse. *Trans R*  
729 *Soc Trop Med Hyg.* 79(1):1–11.  
730  
731 Kumar S, Stecher G, Tamura K. 2016. MEGA7: Molecular Evolutionary genetics analysis version  
732 7.0 for bigger datasets. *Mol Biol Evol.* 33(7):1870–1874.  
733  
734 Kwiatkowski DP. 2005. How malaria has affected the human genome and what human genetics  
735 can teach us about malaria. *Am J Hum Genet.* 77(2):171–92.  
736  
737 Lacerda MVG, Fragoso SCP, Alecrim MGC, et al. 2012. Postmortem characterization of patients  
738 with clinical diagnosis of *Plasmodium vivax* Malaria: To what extent does this parasite kill? *Clin*  
739 *Infect Dis.* 55(8):e67–e74.  
740  
741 Lawson DJ, Hellenthal G, Myers S, Falush D. 2012. Inference of population structure using dense  
742 haplotype data. *PLoS Genet.* 8(1):e1002453.  
743  
744 Leartsakulpanich U, Imwong M, Pukrittayakamee S, et al. 2002. Molecular characterization of  
745 dihydrofolate reductase in relation to antifolate resistance in *Plasmodium vivax*. *Mol Biochem*  
746 *Parasitol.* 119(1):63–73.  
747  
748 Leclerc MC, Durand P, Gauthier C, et al. 2004. Meager genetic variability of the human malaria  
749 agent *Plasmodium vivax*. *Proc Natl Acad Sci.* 101(40):14455–14460.  
750

- 751 Leslie, Winney B, Hellenthal G, et al. 2015. The fine scale genetic structure of the British  
752 population. *Nature*. 519:309–314.  
753
- 754 Li H, Durbin R. 2009. Fast and accurate short read alignment with Burrows-Wheeler transform.  
755 *Bioinformatics*. 25(14):1754–1760.  
756
- 757 Li H, Handsaker B, Wysoker A, et al. 2009. The Sequence Alignment/Map format and SAMtools.  
758 *Bioinformatics*. 25(16):2078–2079.  
759
- 760 Li N, Stephens M. 2003. Modeling linkage disequilibrium and identifying recombination  
761 hotspots using single-nucleotide polymorphism data. *Genetics*. 165(4):2213–2233.  
762
- 763 Lim CS, Tazi L, Ayala FJ. 2005. *Plasmodium vivax*: recent world expansion and genetic identity to  
764 *Plasmodium simium*. *Proc Natl Acad Sci*. 102(43):15523–8.  
765
- 766 Liu W, Li Y, Shaw KS, et al. 2014. African origin of the malaria parasite *Plasmodium vivax*. *Nat*  
767 *Commun*. 5:3346.  
768
- 769 Liu W, Sherrill-Mix S, Learn GH, et al. 2017. Wild bonobos host geographically restricted malaria  
770 parasites including a putative new *Laverania* species. *Nat Commun*. 8(1):1635.  
771
- 772 Loy DE, Liu W, Li Y, et al. 2017. Out of Africa: origins and evolution of the human malaria  
773 parasites *Plasmodium falciparum* and *Plasmodium vivax*. *Int J Parasitol*. 47(2–3):87–97.  
774
- 775 Mak SST, Gopalakrishnan S, Carøe C, et al. 2017. Comparative performance of the BGISEQ-500 vs  
776 Illumina HiSeq2500 sequencing platforms for palaeogenomic sequencing. *Gigascience*. 6(8):1–  
777 13.  
778
- 779 Marciniak S, Prowse TL, Herring DA, et al. 2016. *Plasmodium falciparum* malaria in 1st–2nd  
780 century CE southern Italy. *Curr Biol*. 26(23):R1220–R1222.  
781
- 782 Martin M. 2011. Cutadapt removes adapter sequences from high-throughput sequencing reads.  
783 *EMBnet.journal*. 17(1):10.  
784
- 785 Mathieson I, Lazaridis I, Rohland N, et al. 2015. Genome-wide patterns of selection in 230  
786 ancient Eurasians. *Nature*. 528(7583):499–503.

787

788 Mayxay M, Pukrittayakamee S, Newton PN, et al. 2004. Mixed-species malaria infections in  
789 humans. *Trends Parasitol.* 20(5):233–240.

790

791 McKenna A, Hanna M, Banks E, et al. 2010. The Genome Analysis Toolkit: A MapReduce  
792 framework for analyzing next-generation DNA sequencing data. *Genome Res.* 20:1298–303.

793

794 McManus KF, Taravella AM, Henn BM, et al. 2017. Population genetic analysis of the DARC locus  
795 (Duffy) reveals adaptation from standing variation associated with malaria resistance in  
796 humans. *PLOS Genet.* 13(3):e1006560.

797

798 Menegon M, Majori G, Severini C. 2006. Genetic variations of the *Plasmodium vivax*  
799 dihydropteroate synthase gene. *Acta Trop.* 98(2):196–199.

800

801 Moreira CM, Abo-Shehada M, Price RN, et al. 2015. A systematic review of sub-microscopic  
802 *Plasmodium vivax* infection. *Malar J.* 14(1):360.

803

804 Most H, London IM. 1946. Chloroquine for treatment of acute attacks of vivax malaria. *J Am Med*  
805 *Assoc.* 131:963–967.

806

807 Mu J, Joy DA, Duan J, et al. 2005. Host switch leads to emergence of *Plasmodium vivax* malaria in  
808 humans. *Mol Biol Evol.* 22(8):1686–1693.

809

810 de Oliveira TC, Rodrigues PT, Menezes MJ, et al. 2017. Genome-wide diversity and  
811 differentiation in New World populations of the human malaria parasite *Plasmodium vivax*. *PLoS*  
812 *Negl Trop Dis.* 11(7):e0005824.

813

814 Orjuela-Sánchez P, Filho FSDS, Machado-Lima A, et al. 2009. Analysis of single-nucleotide  
815 polymorphisms in the *crt-o* and *mdr1* genes of *Plasmodium vivax* among chloroquine-resistant  
816 isolates from the Brazilian Amazon region. *Antimicrob Agents Chemother.* 53(8):3561–3564.

817

818 Ott KJ. 1967. Malaria Parasites and Other Haemosporidia. P. C. C. Garnham. Blackwell, Oxford,  
819 England; Davis, Philadelphia, 1966. 1132. 1029–1029.

820

821 Otto TD, Gilabert A, Crellen T, et al. 2018. Genomes of all known members of a *Plasmodium*  
822 subgenus reveal paths to virulent human malaria. *Nat Microbiol.* 3(6):687–697.

823

824 Pasini EM, Bohme U, Rutledge GG, et al. 2017. An improved *Plasmodium cynomolgi* genome  
825 assembly reveals an unexpected methyltransferase gene expansion. *Wellcome Open Res.* 2:42.

826

827 Patterson N, Moorjani P, Luo Y, et al. 2012. Ancient admixture in human history. *Genetics.*  
828 192(3):1065–1093.

829

830 Pearson RD, Amato R, Auburn S, et al. 2016. Genomic analysis of local variation and recent  
831 evolution in *Plasmodium vivax*. *Nat Genet.* 48(8):959–964.

832

833 de Pecoulas PE, K. Basco L, Tahar R, et al. 1998. Analysis of the *Plasmodium vivax* dihydrofolate  
834 reductase–thymidylate synthase gene sequence. *Gene.* 211:177–185.

835

836 Petersen E, Severini C, Picot S. 2013. *Plasmodium vivax* malaria: A re-emerging threat for  
837 temperate climate zones? *Travel Med Infect Dis.* 11(1):51–59.

838

839 Phillips EJ, Keystone JS, Kain KC. 1996. Failure of combined chloroquine and high-dose  
840 primaquine therapy for *Plasmodium vivax* malaria acquired in Guyana, South America. *Clin*  
841 *Infect Dis.* 23(5):1171–1173.

842

843 Pletsch D. 1965. Report on a mission carried out in Spain in September–November 1963 for  
844 verification of the eradication of malaria. *Rev Sanid Hig Publica (Madr).* 39(7):309–367.

845

846 Price RN, Douglas NM, Anstey NM. 2009. New developments in *Plasmodium vivax* malaria:  
847 severe disease and the rise of chloroquine resistance. *Curr Opin Infect Dis.* 22(5):430–435.

848

849 Prugnolle F, Rougeron V, Becquart P, et al. 2013. Diversity, host switching and evolution of  
850 *Plasmodium vivax* infecting African great apes. *Proc Natl Acad Sci.* 110(20):8123–8.

851

852 Rieckmann KH, Davis DR, Hutton DC. 1989. *Plasmodium vivax* resistance to chloroquine? *Lancet.*  
853 2(8673):1183–1184.

854

855 Rieux A, Balloux F. 2016. Inferences from tip-calibrated phylogenies: a review and a practical  
856 guide. *Mol Ecol.* 25(9):1911–1924.

857

858 Rodrigues PT, Valdivia HO, De Oliveira TC, et al. 2018. Human migration and the spread of

859 malaria parasites to the New World. *Sci Rep.* 8(1):1–13.  
860  
861 Sá JM, Nomura T, Neves JDA, et al. 2005. *Plasmodium vivax*: Allele variants of the *mdr1* gene do  
862 not associate with chloroquine resistance among isolates from Brazil, Papua, and monkey-  
863 adapted strains. *Exp Parasitol.* 109(4):256–259.  
864  
865 Samad H, Coll F, Preston MD, et al. 2015. Imputation-based population genetics analysis of  
866 *Plasmodium falciparum* Malaria parasites. *PLoS Genet.* 11(4):e1005131.  
867  
868 Stamatakis A. 2014. RAxML version 8: a tool for phylogenetic analysis and post-analysis of large  
869 phylogenies. *Bioinformatics.* 30(9):1312–1313.  
870  
871 Suwanarusk R, Russell B, Chavchich M, et al. 2007. Chloroquine resistant *Plasmodium vivax*: In  
872 vitro characterisation and association with molecular polymorphisms. *PLoS One.* 2(10):1–9.  
873  
874 Tachibana S-I, Sullivan SA, Kawai S, et al. 2012. *Plasmodium cynomolgi* genome sequences  
875 provide insight into *Plasmodium vivax* and the monkey malaria clade. *Nat Genet.* 44(9):1051–  
876 1055.  
877  
878 Tanabe K, Mita T, Jombart T, et al. 2010. *Plasmodium falciparum* accompanied the human  
879 expansion out of Africa. *Curr Biol.* 20(14):1283–1289.  
880  
881 Taylor JE, Pacheco MA, Bacon DJ, et al. 2013. The evolutionary history of *Plasmodium vivax* as  
882 inferred from mitochondrial genomes: parasite genetic diversity in the Americas. *Mol Biol Evol.*  
883 30(9):2050–64.  
884  
885 Tishkoff SA, Varkonyi R, Cahinhinan N, et al. 2001. Haplotype diversity and linkage  
886 disequilibrium at human G6PD: recent origin of alleles that confer malarial resistance. *Science.*  
887 293(5529):455–62.  
888  
889 Tjitra E, Anstey NM, Sugiarto P, et al. 2008. Multidrug-Resistant *Plasmodium vivax* associated  
890 with severe and fatal Malaria: A prospective study in Papua, Indonesia. *PLoS Med.* 5(6):e128.  
891  
892 Twohig KA, Pfeffer DA, Baird JK, et al. 2019. Growing evidence of *Plasmodium vivax* across  
893 malaria-endemic Africa. *PLoS Negl Trop Dis.* 13(1):e0007140.  
894



- 895 Waters MR, Keene JL, Forman SL, et al. 2018. Pre-Clovis projectile points at the Debra L.  
896 Friedkin site, Texas—Implications for the Late Pleistocene peopling of the Americas. *Sci Adv.*  
897 4(10):eaat4505.  
898
- 899 Weiss DJ, Lucas TCD, Nguyen M, et al. 2019. Mapping the global prevalence, incidence, and  
900 mortality of *Plasmodium falciparum*, 2000-17: a spatial and temporal modelling study. *Lancet.*  
901 394(10195):322-331.  
902
- 903 White NJ. 2011. Determinants of relapse periodicity in *Plasmodium vivax* malaria. *Malar J.*  
904 10(1):297.  
905
- 906 World Health Organisation. 2017. World Malaria Report 2017.  
907 <https://www.who.int/malaria/publications/world-malaria-report-2017/en/>  
908
- 909 Zhao X, Smith DL, Tatem AJ. 2016. Exploring the spatiotemporal drivers of malaria elimination  
910 in Europe. *Malar J.* 15(1):1-13.  
911
- 912 Zhu SJ, Almagro-Garcia J, McVean G. 2018. Deconvolution of multiple infections in *Plasmodium*  
913 *falciparum* from high throughput sequencing data. *Bioinformatics.* 34(1):9-15.  
914
- 915 De Zulueta J. 1973. Malaria and Mediterranean history. *Parassitologia.* 15(1):1-15.  
916

917 **Figures and Captions**

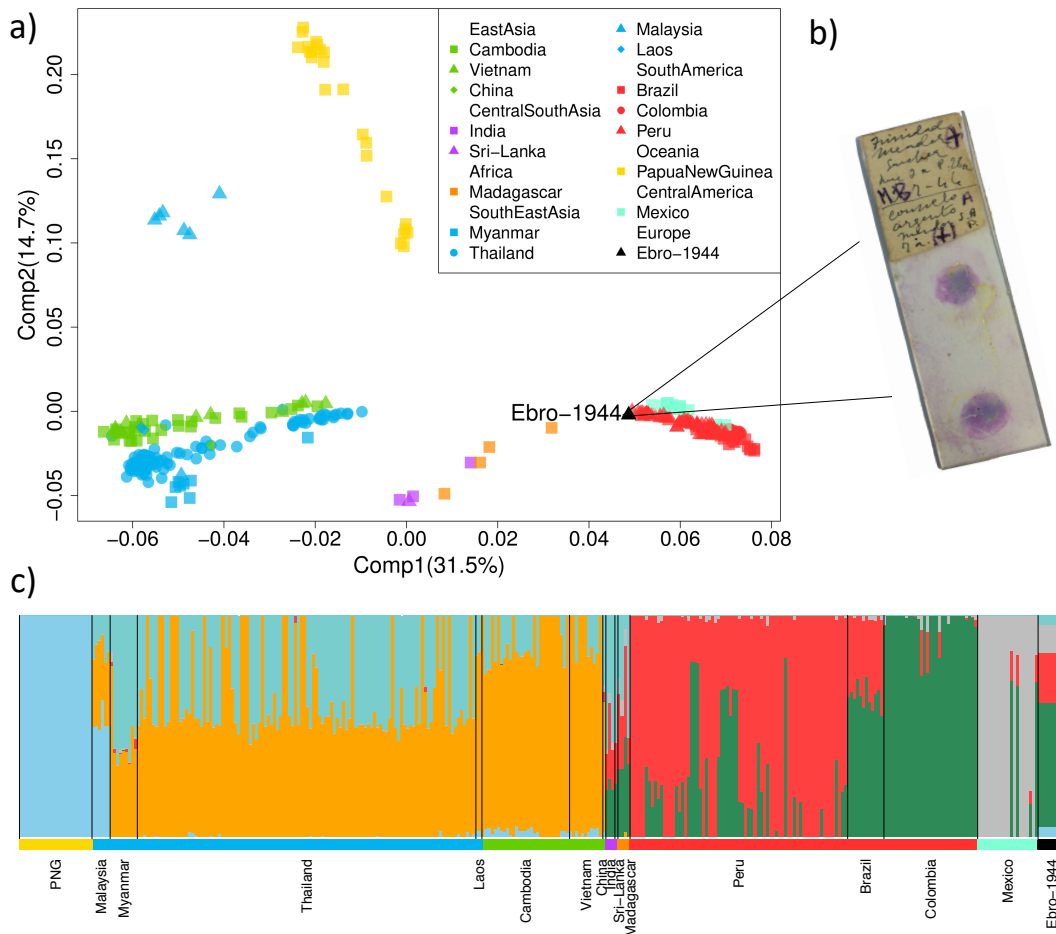

918

919 **Fig. 1:** a) Principal components analysis (PCA) of the historic Ebro-1944 sample together with a  
920 geographically diverse set of modern *P. vivax* strains. b) Example microscopy slide stained with the  
921 blood of patient's infected with malaria from the Ebro Delta, Spain, in the 1940s. c) Unsupervised  
922 ADMIXTURE clustering analysis at  $K=6$ . Samples are arranged by geographic region and coloured as  
923 in a).

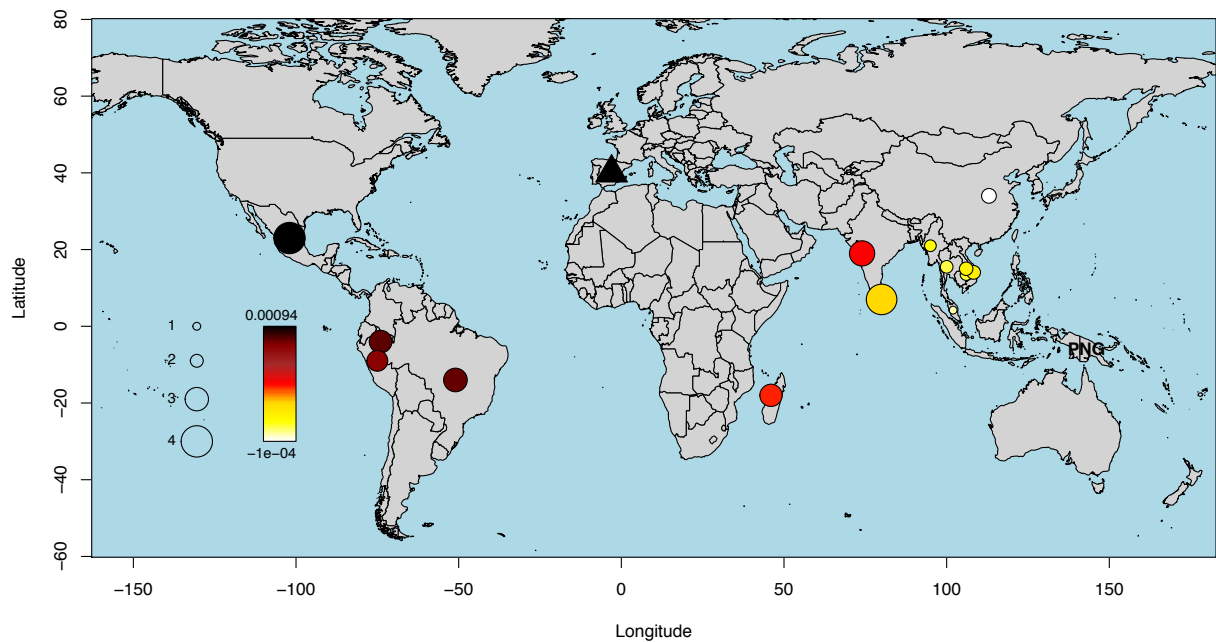

924

925 **Fig. 2:**  $f_4$ -values inferred under the test relationship (*P. cynomolgi*, Ebro-1944; Papua New Guinea  
926 (PNG), Y), where Y iterates through the geographic sampling locations of our included strains. The  
927 colour scale provides the value of the  $f_4$  statistic with the significance (absolute z score), assessed  
928 through block jack-knife resampling, provided by the circle size. A more positive  $f_4$  value indicates a  
929 closer relationship of Ebro-1944 to Y relative to PNG.

930

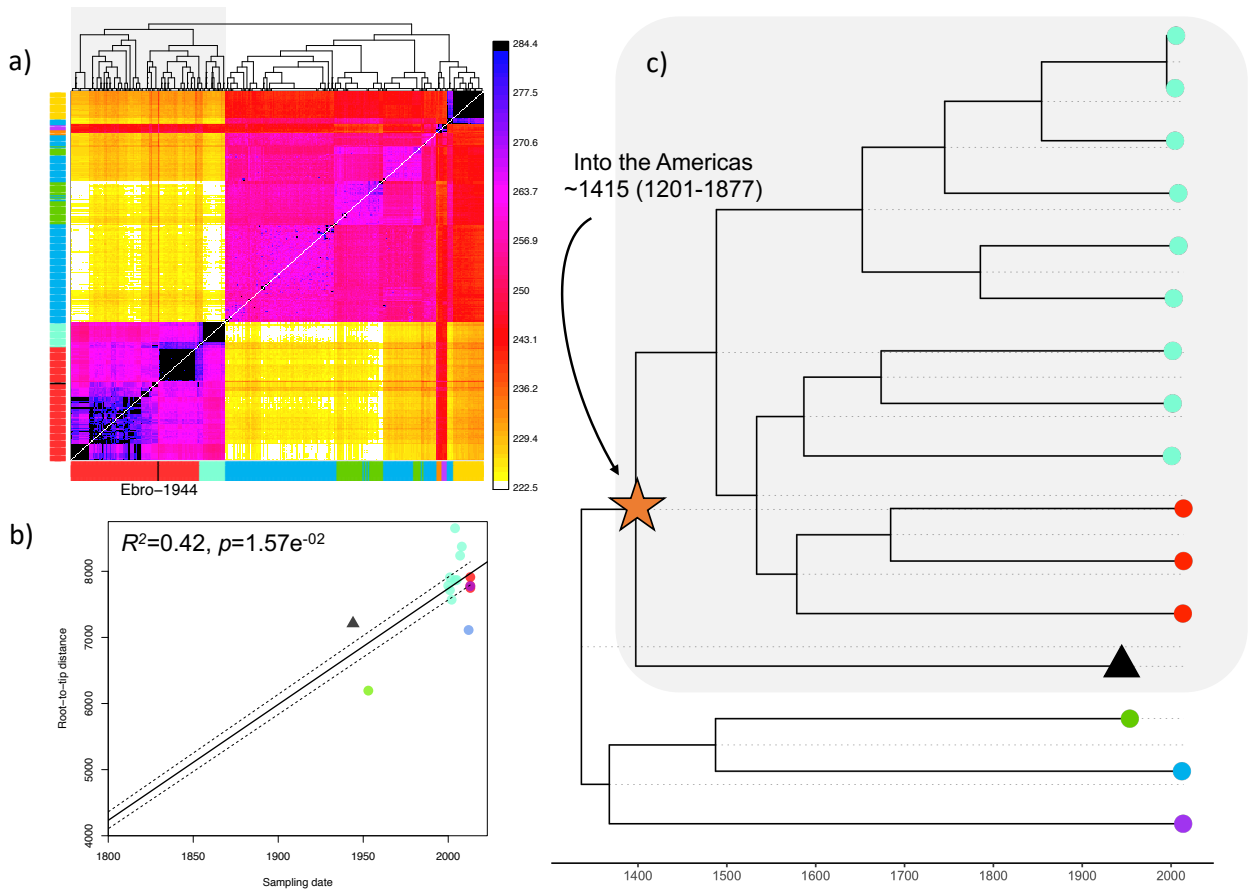

931

932 **Fig. 3:** a) CHROMOPAINTER's inferred counts of matching DNA genome wide that each of the 104  
933 inferred clusters (columns) is painted by each of the 104 clusters (rows). The tree at top shows  
934 fineSTRUCTURE's inferred hierarchical merging of these 104 clusters and the colours on the axes  
935 give the continental region and population to which strains in each cluster are assigned. Ebro-1944 is  
936 depicted in black and clusters with the sample from Peru and Brazil. b) Root-to-tip distances of our  
937 included *P. vivax* strains correlated with the date of isolation. The regression was significant  
938 following 1000 random permutations of sampling date. c) Tip-dated phylogenetic tree obtained with  
939 BEAST 2. The mean posterior probability for time to the most recent common ancestor of the split  
940 between the historical European strain and the American isolates is indicated. Strains are coloured as  
941 in fig. 1a.
